# Supplementary material for: CD133-positive dermal papilla cells are a major driver in promoting hair follicle formation
Source: Research Square preprint supplement (doi:10.21203/rs.3.rs-5054470/v1), 2025-04-23
Supplement: Supplementary file 1 [file a0dcad8a7c537f5eb57d12b8.pdf]

*Versican-EGFP*; *CD133-CreER<sup>T2</sup>*; *CAG-tdTomato* mice were treated with tamoxifen five times every other day between P19-P28.

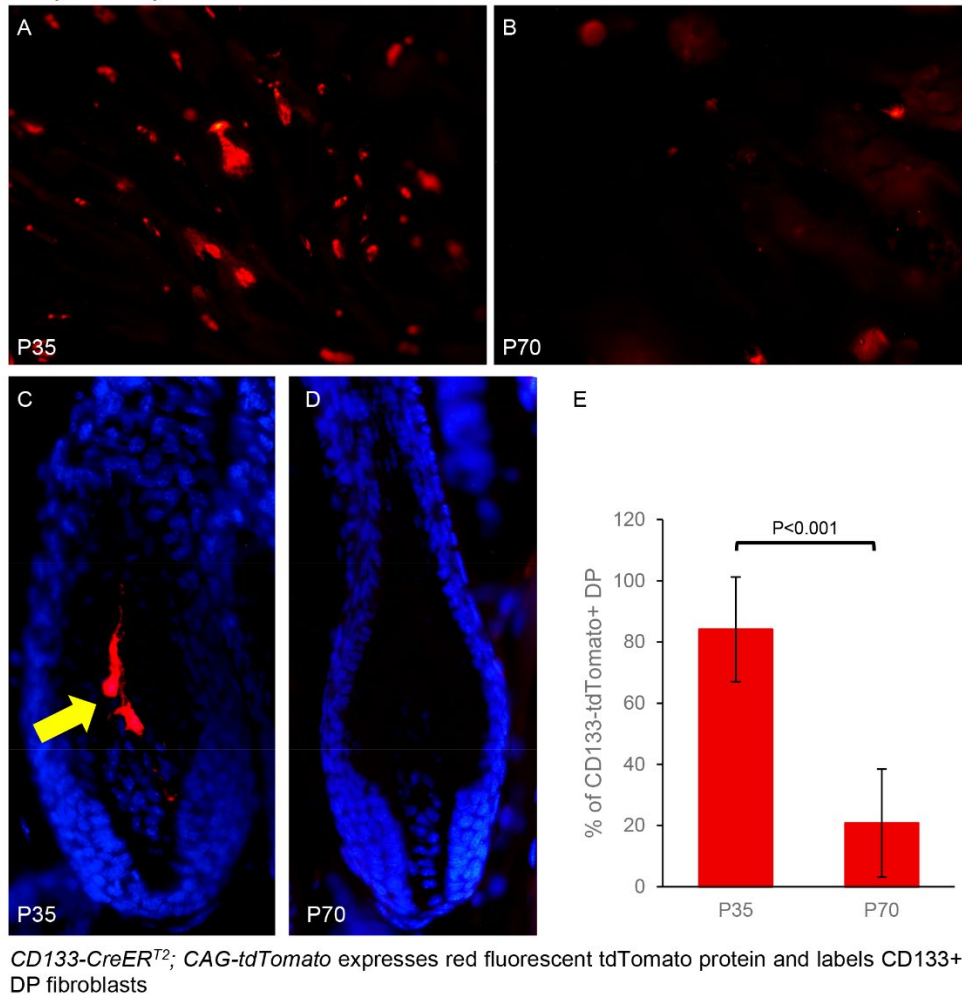

**Figure S1 CD133+ DP fibroblasts are not maintained through the hair follicle telogen phase.**

*Versican-EGFP*; *CD133-CreER<sup>T2</sup>*; *CAG-tdTomato* mice were treated with tamoxifen to induce tdTomato expression in CD133+ cells five times every other day between P19-P28. No tamoxifen was administered afterwards. **A, C.** At P35, red fluorescence can be seen in the DP region of each hair follicle (**C**) from the dermal side of the skin (**A**). **B, D.** At P70, red fluorescence can be seen in their DP regions as shown from the dermal side (**B**) and in individual hair follicle (**D**). **E.** Percentages of hair follicles harboring red fluorescence in P35 and P70 mouse skin. A minimum of 30 hair follicles in three mice at P35 and P70 respectively were counted. \* $P \leq 0.05$ ; \*\* $P \leq 0.01$ ; \*\*\* $P \leq 0.001$ ; ns, not significant.

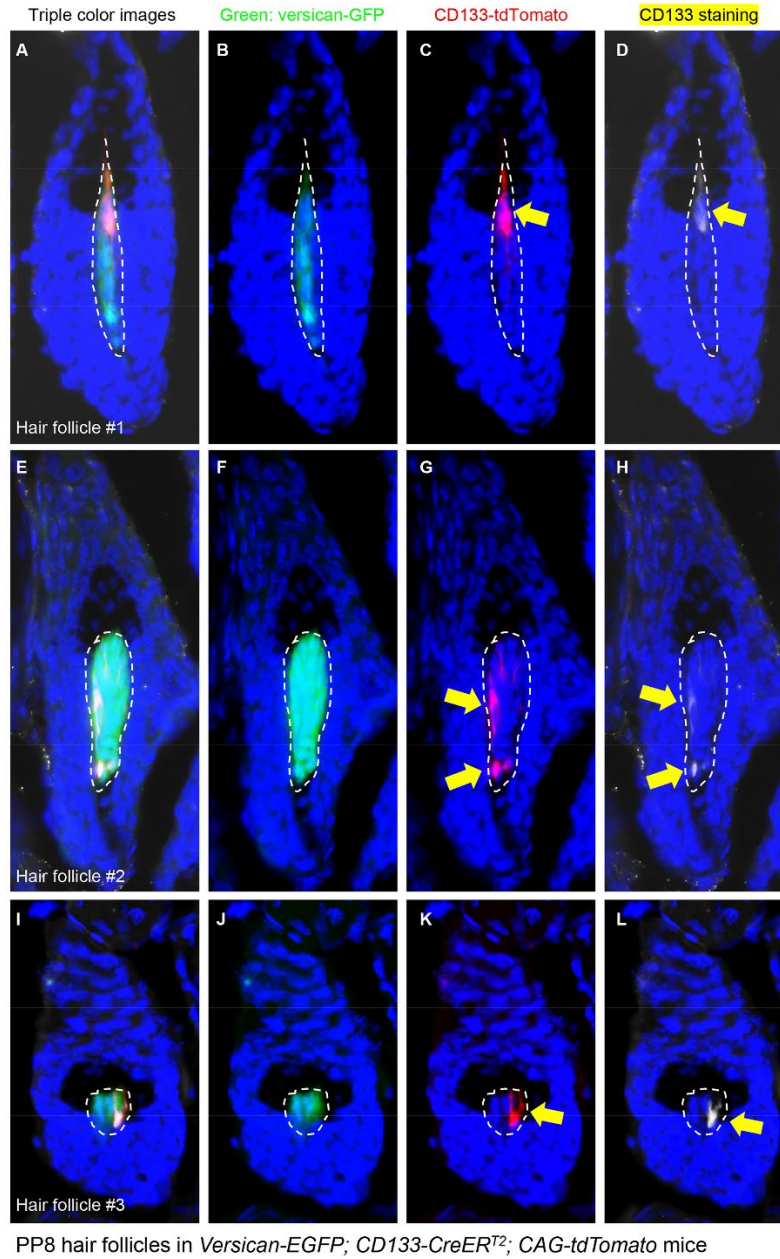

**Figure S2 Red fluorescent tdTomato<sup>+</sup> cells overlap with APC<sup>+</sup> cells in the DP region of *Versican-EGFP*; *CD133-CreER<sup>T2</sup>*; *CAG-tdTomato* hair follicles.** Frozen section of three PP8 hair follicles collected from *Versican-EGFP*; *CD133-CreER<sup>T2</sup>*; *CAG-tdTomato* mice were stained using an anti-CD133 primary antibody and a APC-conjugated secondary antibody and showed red fluorescent DP cells were the same population that was stained as APC<sup>+</sup> for CD133 expression. **A-D**, hair follicle #1; **E-H**, hair follicle #2; **I-L**, hair follicle #3.

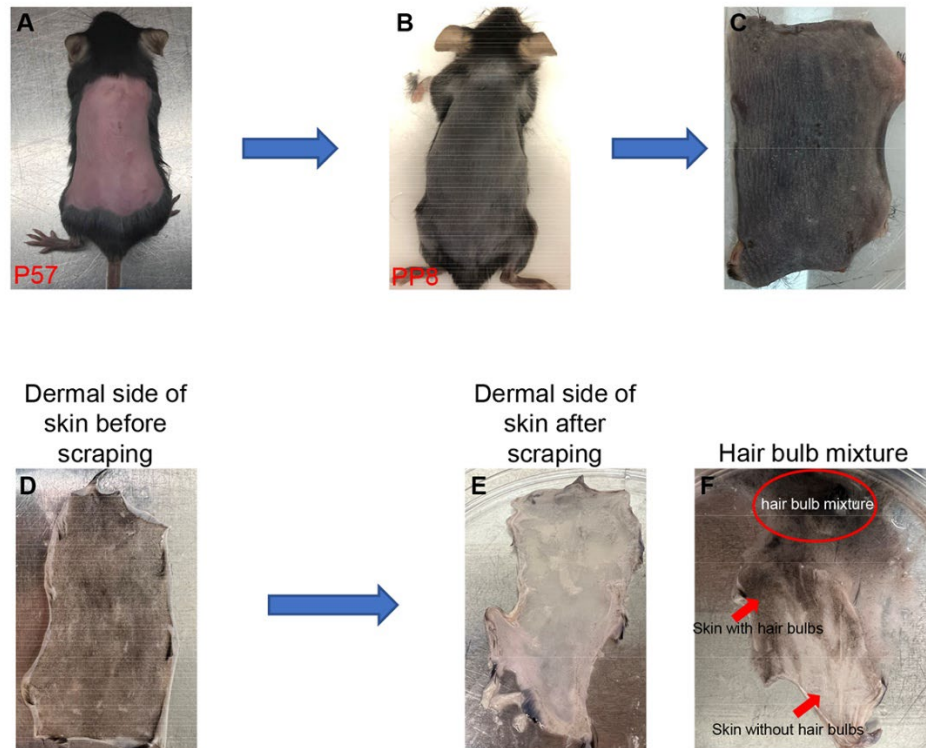

**Figure S3 Isolation of versican<sup>+</sup>; CD133<sup>+</sup> and versican<sup>+</sup>; CD133<sup>-</sup> DP cells from *versican-GFP*; *CD133-CreER<sup>T2</sup>*; *CAG-tdTomato* transgenic mice.** **A.** Hairs on the back of the mouse were plucked at P57. **B.** Mouse back skin was collected eight days after hair plucking. **C.** Collected skin was floated in a solution of collagenase I, collagenase IV, and hyaluronidase with the dermal side facing down for 30 minutes. **D.** The dermal side of the skin. HF bulbs could be seen. **E-F.** The HF bulbs were scraped off using a razor blade. No black HFs could be seen on the dermal side of skin. The HF bulb mixture in the dish is circled with a red circle.

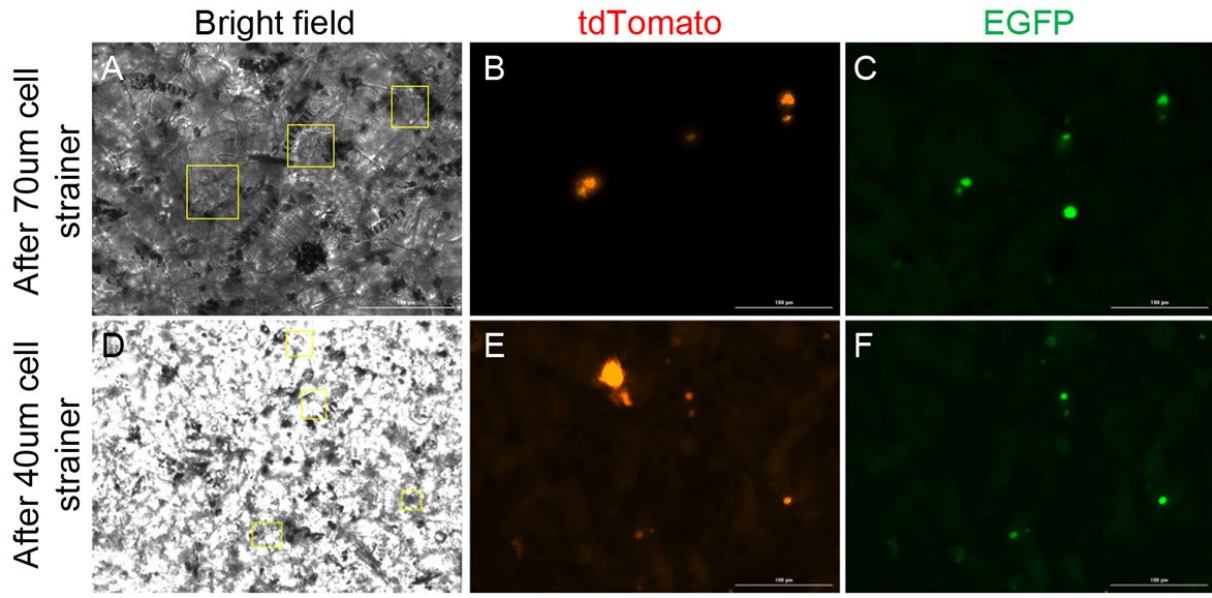

**Figure S4 Preparation of versican<sup>+</sup>; CD133<sup>+</sup> and versican<sup>+</sup>; CD133<sup>-</sup> single DP cell mixtures from anagen hair follicles.** The HF bulb mixture was digested to generate a single-cell mixture. Cell debris and tissue aggregates were removed by filtering the cell mixture through a 70-µm cell strainer (**A-C**) and a 40-µm cell strainer (**D-F**). Red and green DP fibroblasts and green-only DP fibroblasts can be seen in the filtered mixture using a cyotation imager. Scale bar: 100 µm.

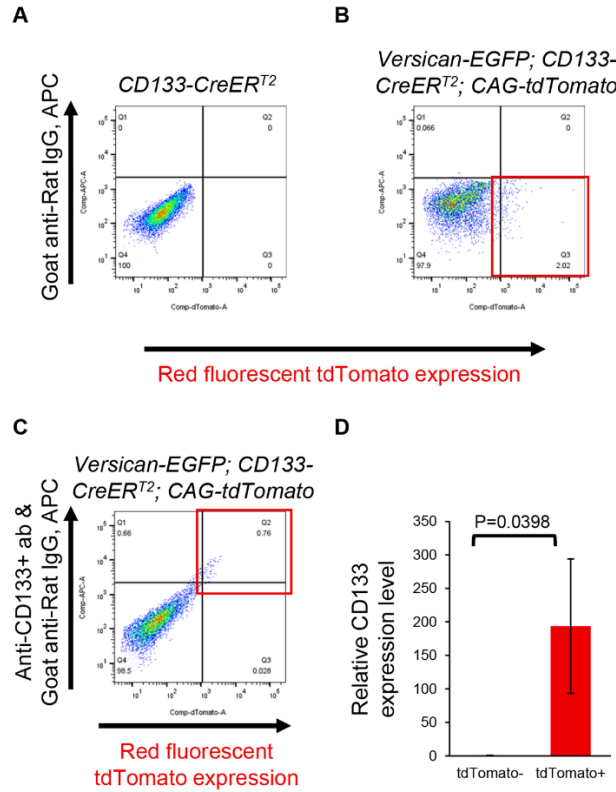

**Figure S5 Red fluorescent tdTomato<sup>+</sup> cells in the DP region of *Versican-EGFP; CD133-CreERT<sup>2</sup>; CAG-tdTomato* hair follicles express CD133.** Flow cytometry analysis of isolated red tdTomato-tagged DP fibroblasts express CD133. In **A**, isolated Green<sup>-</sup>; red<sup>-</sup> DP cells from *CD133-CreERT<sup>2</sup>* mouse were stained with APC-conjugated goat anti-Rat IgG secondary antibody and used as APC negative control. In **B**, isolated DP cells from *versican-EGFP; CD133-CreERT<sup>2</sup>; CAG-tdTomato* mouse were stained with APC-conjugated secondary antibody and showed a population of red<sup>+</sup>; APC<sup>-</sup> cells in quadrant 3 (Q3 in red box). In **C**, isolated DP cells from *versican-EGFP; CD133-CreERT<sup>2</sup>; CAG-tdTomato* mouse were stained with an anti-CD133 primary antibody and a APC-conjugated secondary antibody and showed red<sup>+</sup> DP cells to be APC<sup>+</sup> in Q2 (in red box). **D**. Relative CD133 expression levels in isolated red fluorescent (tdTomato<sup>+</sup>) and tdTomato<sup>-</sup> DP cells by qPCR. The expression level of CD133 in tdTomato<sup>-</sup> DP cells was set as 1 to normalize the expression level of CD133 in tdTomato<sup>+</sup> DP cells. n=3. The data are presented as the mean  $\pm$  SD.



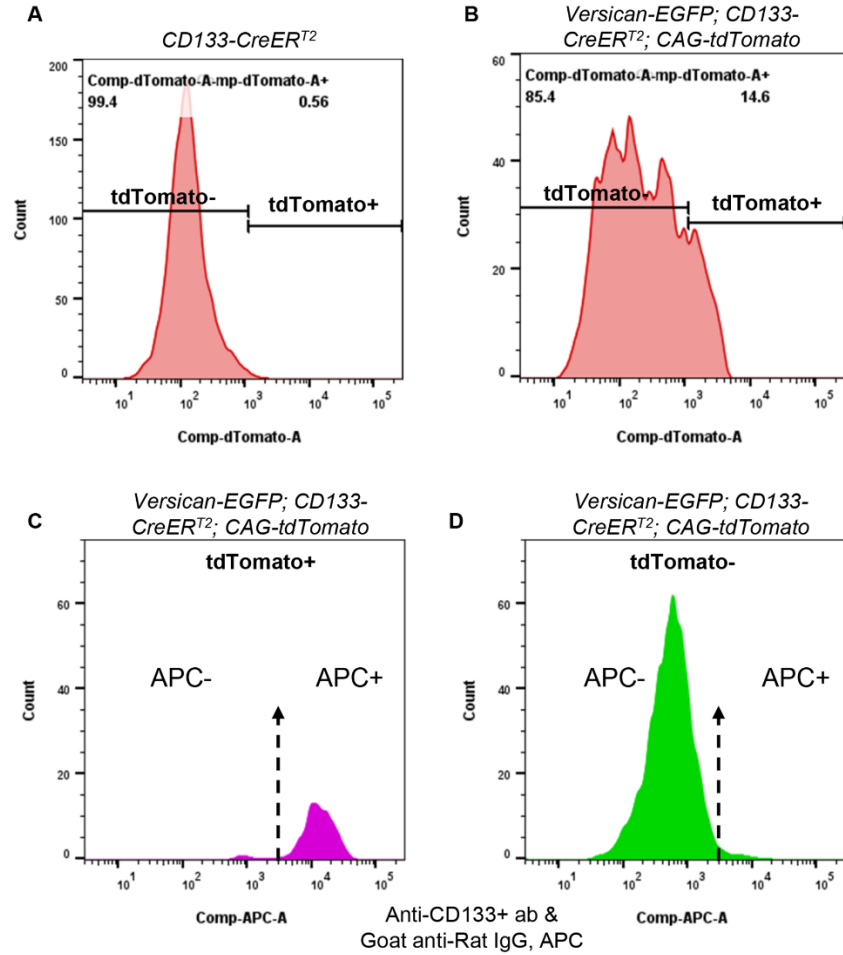

**Figure S6 Non-red fluorescent tdTomato- cells in the DP region of *Versican-EGFP; CD133-CreER<sup>T2</sup>; CAG-tdTomato* hair follicles do not express CD133.** Flow cytometry analysis of isolated DP cells from *Versican-EGFP; CD133-CreER<sup>T2</sup>; CAG-tdTomato* PP8 hair follicles stained with an anti-CD133 primary antibody and a APC-conjugated secondary antibody. **A.** Isolated DP cells from *CD133-CreER<sup>T2</sup>* hair follicles were used as a negative control for red fluorescent tdTomato expression. **B.** Isolated DP cells from *Versican-EGFP; CD133-CreER<sup>T2</sup>; CAG-tdTomato* hair follicles showed two subpopulations with and without red fluorescent tdTomato expression. **C.** tdTomato+ DP cells gated in B showed CD133 expression indicated by positive APC staining. **D.** tdTomato- DP cells gated in B showed no CD133 expression indicated by negative APC staining. Flow analysis was repeated three times using isolated DP cells from three different mice.

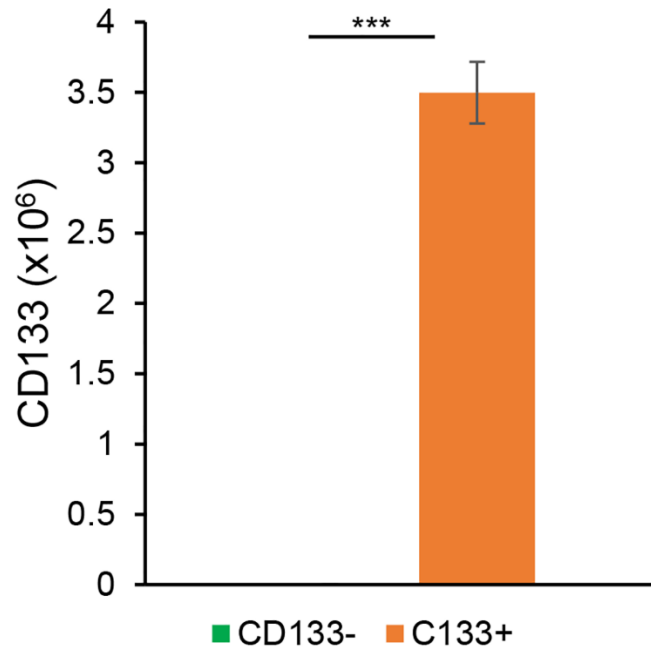

**Figure S7 CD133+ DP fibroblasts but not CD133- DP cells retain CD133 expression in 3D spheroid culture.** CD133+ and CD133- spheroids cultured for three days were collected for the evaluation of CD133 expression by qPCR. The Y-axis represents the relative CD133 expression levels with the level in versican+; CD133- DP cells set to 1. n=3. The data are presented as the mean  $\pm$  SD. \*P  $\leq$  0.05; \*\*P  $\leq$  0.01; \*\*\*P  $\leq$  0.001; ns, not significant.
